# Supplementary material
Source: PubMed Central journal article supplement (PMC9081026)
Supplement: Supp_TableS1.pdf [file Supp_TableS1.pdf]

# Supplementary Analysis

## “Assessing COVID-19 Pandemic Risk Perception and Response Preparedness in Veterinary and Animal Care Workers”

Dalton et. al., 2021

### Supplemental Table 1 - Extended Job and Demographic Characteristics

| Job & Demographic Variables N(%)    | data (N = 1,577)  |
|-------------------------------------|-------------------|
| <b>US Region</b>                    |                   |
| Northeast/Mid-Atlantic              | 515 (33)          |
| Southeast                           | 243 (16)          |
| North Midwest                       | 281 (18)          |
| South Midwest                       | 133 (9)           |
| Mountain                            | 159 (10)          |
| Pacific                             | 186 (12)          |
| Outside Continental US              | 34 (2)            |
| <b>Area in Stay-at-Home Order</b>   |                   |
| Yes                                 | 949 (60)          |
| <b>Age</b>                          |                   |
| 18-29                               | 274 (17)          |
| 30-39                               | 541 (34)          |
| 40-49                               | 412 (26)          |
| 50-59                               | 224 (14)          |
| 60-69                               | 103 (7)           |
| 69+                                 | 16 (1)            |
| Prefer Not to Say                   | 4 (0)             |
| <b>Race/Ethnicity</b>               |                   |
| White                               | 1,374 (87)        |
| Hispanic / Latino                   | 66 (4)            |
| Black / African American            | 15 (1)            |
| Asian                               | 34 (2)            |
| Other                               | 82 (5)            |
| <b>Marital Status</b>               |                   |
| Married / Domestic Partnership      | 958 (61)          |
| Single / Divorced / Widowed         | 581 (37)          |
| Other / Prefer Not to Say           | 29 (2)            |
| <b>Household Number</b>             |                   |
| Min                                 | 0                 |
| Mean +/- SD                         | 2.62 ± 1.32       |
| Median (IQR)                        | 2.00 (2.00, 3.00) |
| Max                                 | 20                |
| <b>Dependent Number</b>             |                   |
| Min                                 | 0                 |
| Mean +/- SD                         | 0.68 ± 1.01       |
| Median (IQR)                        | 0.00 (0.00, 1.00) |
| Max                                 | 6                 |
| <b>Living with Essential Worker</b> |                   |
| Yes                                 | 695 (44)          |
| <b>Annual Household Income</b>      |                   |
| Less than \$50,000                  | 259 (17)          |

| <b>Job &amp; Demographic Variables N(%)</b> | <b>data (N = 1,577)</b> |
|---------------------------------------------|-------------------------|
| \$50,001 – \$100,000                        | 427 (27)                |
| \$100,001 - \$200,000                       | 561 (36)                |
| Greater than \$200,000                      | 187 (12)                |
| Prefer Not to Say                           | 124 (8)                 |
