# Supplementary material
Source: PubMed Central journal article supplement (PMC9081026)
Supplement: Supp_TableS2.pdf [file Supp_TableS2.pdf]

# Supplemental Table 2 - Distribution of Likert Questions and Outcome Aggregated Scores

## Aggregated Knowledge Score

How knowledgeable are you regarding the ..... (1 = least knowledgeable, 5 = most knowledgeable)

| Label                                                                  | Stats / Values                                                               | Freqs (% of Valid) | Graph | Valid           |
|------------------------------------------------------------------------|------------------------------------------------------------------------------|--------------------|-------|-----------------|
| Public health impacts of the pandemic in general?                      | Mean (sd) : 3.7 (0.7)<br>min < med < max:<br>1 < 4 < 5<br>IQR (CV) : 1 (0.2) | 1 : 11 ( 0.7%)     |       | 1576<br>(99.9%) |
|                                                                        |                                                                              | 2 : 67 ( 4.3%)     |       |                 |
|                                                                        |                                                                              | 3 : 498 (31.6%)    |       |                 |
|                                                                        |                                                                              | 4 : 844 (53.6%)    |       |                 |
|                                                                        |                                                                              | 5 : 156 ( 9.9%)    |       |                 |
|                                                                        |                                                                              |                    |       |                 |
| Your personal risk during the pandemic?                                | Mean (sd) : 4 (0.7)<br>min < med < max:<br>1 < 4 < 5<br>IQR (CV) : 0 (0.2)   | 1 : 8 ( 0.5%)      |       | 1574<br>(99.8%) |
|                                                                        |                                                                              | 2 : 33 ( 2.1%)     |       |                 |
|                                                                        |                                                                              | 3 : 253 (16.1%)    |       |                 |
|                                                                        |                                                                              | 4 : 964 (61.2%)    |       |                 |
|                                                                        |                                                                              | 5 : 316 (20.1%)    |       |                 |
|                                                                        |                                                                              |                    |       |                 |
| Ability to answer pandemic-related questions from clients or visitors? | Mean (sd) : 3.6 (0.8)<br>min < med < max:<br>1 < 4 < 5<br>IQR (CV) : 1 (0.2) | 1 : 14 ( 0.9%)     |       | 1573<br>(99.7%) |
|                                                                        |                                                                              | 2 : 136 ( 8.6%)    |       |                 |
|                                                                        |                                                                              | 3 : 449 (28.5%)    |       |                 |
|                                                                        |                                                                              | 4 : 764 (48.6%)    |       |                 |
|                                                                        |                                                                              | 5 : 210 (13.4%)    |       |                 |
|                                                                        |                                                                              |                    |       |                 |
| Safety practices at work that are specific to COVID-19?                | Mean (sd) : 4.1 (0.8)<br>min < med < max:<br>1 < 4 < 5<br>IQR (CV) : 1 (0.2) | 1 : 6 ( 0.4%)      |       | 1573<br>(99.7%) |
|                                                                        |                                                                              | 2 : 56 ( 3.6%)     |       |                 |
|                                                                        |                                                                              | 3 : 202 (12.8%)    |       |                 |
|                                                                        |                                                                              | 4 : 870 (55.3%)    |       |                 |
|                                                                        |                                                                              | 5 : 439 (27.9%)    |       |                 |
|                                                                        |                                                                              |                    |       |                 |

## Aggregated Confidence Score

How confident are you regarding the ..... (1 = least confident, 5 = most confident)

| Label                                             | Stats / Values                                                               | Freqs (% of Valid) | Graph | Valid           |
|---------------------------------------------------|------------------------------------------------------------------------------|--------------------|-------|-----------------|
| Your safety at work in general?                   | Mean (sd) : 3.8 (0.9)<br>min < med < max:<br>1 < 4 < 5<br>IQR (CV) : 1 (0.2) | 1 : 22 ( 1.4%)     |       | 1574<br>(99.8%) |
|                                                   |                                                                              | 2 : 104 ( 6.6%)    |       |                 |
|                                                   |                                                                              | 3 : 399 (25.3%)    |       |                 |
|                                                   |                                                                              | 4 : 708 (45.0%)    |       |                 |
|                                                   |                                                                              | 5 : 341 (21.7%)    |       |                 |
|                                                   |                                                                              |                    |       |                 |
| Your safety at work that is specific to COVID-19? | Mean (sd) : 3.2 (1.2)<br>min < med < max:<br>1 < 3 < 5<br>IQR (CV) : 2 (0.4) | 1 : 132 ( 8.4%)    |       | 1572<br>(99.7%) |
|                                                   |                                                                              | 2 : 303 (19.3%)    |       |                 |
|                                                   |                                                                              | 3 : 471 (30.0%)    |       |                 |
|                                                   |                                                                              | 4 : 451 (28.7%)    |       |                 |
|                                                   |                                                                              | 5 : 215 (13.7%)    |       |                 |
|                                                   |                                                                              |                    |       |                 |

## Aggregated Threat Score

What is your likelihood of ..... (1 = least likely, 5 = most likely)

| Label                                                     | Stats / Values                                                               | Freqs (% of Valid) | Graph | Valid           |
|-----------------------------------------------------------|------------------------------------------------------------------------------|--------------------|-------|-----------------|
| Being exposed to SARS-CoV-2 as part of your job function? | Mean (sd) : 3.1 (1.2)<br>min < med < max:<br>1 < 3 < 5<br>IQR (CV) : 2 (0.4) | 1 : 132 ( 8.4%)    |       | 1576<br>(99.9%) |
|                                                           |                                                                              | 2 : 354 (22.5%)    |       |                 |
|                                                           |                                                                              | 3 : 522 (33.1%)    |       |                 |
|                                                           |                                                                              | 4 : 342 (21.7%)    |       |                 |
|                                                           |                                                                              | 5 : 226 (14.3%)    |       |                 |
|                                                           |                                                                              |                    |       |                 |

| Label                                                                 | Stats / Values                                                               | Freqs (% of Valid)                                                                          | Graph | Valid           |
|-----------------------------------------------------------------------|------------------------------------------------------------------------------|---------------------------------------------------------------------------------------------|-------|-----------------|
| You becoming sick with COVID-19 disease as a result of your job?      | Mean (sd) : 2.8 (1.1)<br>min < med < max:<br>1 < 3 < 5<br>IQR (CV) : 2 (0.4) | 1 : 197 (12.5%)<br>2 : 430 (27.3%)<br>3 : 528 (33.5%)<br>4 : 282 (17.9%)<br>5 : 139 (8.8%)  |       | 1576<br>(99.9%) |
| Your co-workers becoming sick with COVID-19 as a result of their job? | Mean (sd) : 3 (1.2)<br>min < med < max:<br>1 < 3 < 5<br>IQR (CV) : 2 (0.4)   | 1 : 158 (10.1%)<br>2 : 381 (24.3%)<br>3 : 505 (32.1%)<br>4 : 331 (21.1%)<br>5 : 196 (12.5%) |       | 1571<br>(99.6%) |
| Becoming seriously ill with COVID-19 disease as a result of your job? | Mean (sd) : 3.3 (1.2)<br>min < med < max:<br>1 < 3 < 5<br>IQR (CV) : 2 (0.4) | 1 : 141 (9.0%)<br>2 : 315 (20.1%)<br>3 : 414 (26.4%)<br>4 : 400 (25.5%)<br>5 : 296 (18.9%)  |       | 1566<br>(99.3%) |
| You spreading SARS-CoV-2 to others around you?                        | Mean (sd) : 2.6 (1.2)<br>min < med < max:<br>1 < 3 < 5<br>IQR (CV) : 1 (0.4) | 1 : 282 (18.0%)<br>2 : 476 (30.4%)<br>3 : 447 (28.5%)<br>4 : 253 (16.1%)<br>5 : 110 (7.0%)  |       | 1568<br>(99.4%) |

Do you agree with the following statements .... (1 = strongly disagree, 5 = strongly agree)

| Label                                                                           | Stats / Values                                                               | Freqs (% of Valid)                                                                          | Graph | Valid            |
|---------------------------------------------------------------------------------|------------------------------------------------------------------------------|---------------------------------------------------------------------------------------------|-------|------------------|
| The COVID-19 pandemic has severe public health consequences to those around me. | Mean (sd) : 4.1 (1)<br>min < med < max:<br>1 < 4 < 5<br>IQR (CV) : 1 (0.3)   | 1 : 39 (2.5%)<br>2 : 89 (5.6%)<br>3 : 259 (16.4%)<br>4 : 436 (27.6%)<br>5 : 754 (47.8%)     |       | 1577<br>(100.0%) |
| The COVID-19 pandemic is likely to negatively influence my job role.            | Mean (sd) : 3.1 (1.3)<br>min < med < max:<br>1 < 3 < 5<br>IQR (CV) : 2 (0.4) | 1 : 242 (15.3%)<br>2 : 326 (20.7%)<br>3 : 374 (23.7%)<br>4 : 373 (23.7%)<br>5 : 262 (16.6%) |       | 1577<br>(100.0%) |
| I am at risk of COVID-19 disease because of my job role                         | Mean (sd) : 3.6 (1.2)<br>min < med < max:<br>1 < 4 < 5<br>IQR (CV) : 1 (0.3) | 1 : 109 (6.9%)<br>2 : 203 (12.9%)<br>3 : 281 (17.8%)<br>4 : 590 (37.4%)<br>5 : 394 (25.0%)  |       | 1577<br>(100.0%) |
| Others around me are at risk of COVID-19 disease because of my job role.        | Mean (sd) : 3.4 (1.3)<br>min < med < max:<br>1 < 4 < 5<br>IQR (CV) : 2 (0.4) | 1 : 169 (10.7%)<br>2 : 233 (14.8%)<br>3 : 308 (19.5%)<br>4 : 523 (33.2%)<br>5 : 344 (21.8%) |       | 1577<br>(100.0%) |

## Aggregated Efficacy Score

What is the importance of ..... (1 = least important, 5 = most important)

| Label                                                                                                         | Stats / Values                                                               | Freqs (% of Valid)                                                                      | Graph | Valid           |
|---------------------------------------------------------------------------------------------------------------|------------------------------------------------------------------------------|-----------------------------------------------------------------------------------------|-------|-----------------|
| Your job roles and responsibilities during a pandemic or other emergent situation?                            | Mean (sd) : 4.1 (0.9)<br>min < med < max:<br>1 < 4 < 5<br>IQR (CV) : 1 (0.2) | 1 : 18 (1.1%)<br>2 : 75 (4.8%)<br>3 : 266 (17.0%)<br>4 : 562 (35.8%)<br>5 : 647 (41.3%) |       | 1568<br>(99.4%) |
| Your individual role to the overall function of your workplace during a pandemic or other emergent situation? | Mean (sd) : 4.3 (0.9)<br>min < med < max:<br>1 < 5 < 5<br>IQR (CV) : 1 (0.2) | 1 : 22 (1.4%)<br>2 : 44 (2.8%)<br>3 : 211 (13.4%)<br>4 : 505 (32.2%)<br>5 : 788 (50.2%) |       | 1570<br>(99.6%) |

Do you agree with the following statements .... (1 = strongly disagree, 5 = strongly agree)

| Label                                                                                                                       | Stats / Values                                                               | Freqs (% of Valid)                                                                          | Graph | Valid            |
|-----------------------------------------------------------------------------------------------------------------------------|------------------------------------------------------------------------------|---------------------------------------------------------------------------------------------|-------|------------------|
| I am able to perform my duties successfully during the COVID-19 pandemic.                                                   | Mean (sd) : 4.2 (0.9)<br>min < med < max:<br>1 < 4 < 5<br>IQR (CV) : 1 (0.2) | 1 : 26 ( 1.6%)<br>2 : 85 ( 5.4%)<br>3 : 143 ( 9.1%)<br>4 : 658 (41.7%)<br>5 : 665 (42.2%)   |       | 1577<br>(100.0%) |
| My co-workers are able to perform their duties successfully during the COVID-19 pandemic.                                   | Mean (sd) : 4.1 (0.9)<br>min < med < max:<br>1 < 4 < 5<br>IQR (CV) : 1 (0.2) | 1 : 21 ( 1.3%)<br>2 : 115 ( 7.3%)<br>3 : 179 (11.4%)<br>4 : 692 (43.9%)<br>5 : 570 (36.1%)  |       | 1577<br>(100.0%) |
| If I perform my duties successfully, it will make a big difference in the success of the response to the COVID-19 pandemic. | Mean (sd) : 3.2 (1.2)<br>min < med < max:<br>1 < 3 < 5<br>IQR (CV) : 2 (0.4) | 1 : 169 (10.7%)<br>2 : 248 (15.7%)<br>3 : 496 (31.5%)<br>4 : 372 (23.6%)<br>5 : 292 (18.5%) |       | 1577<br>(100.0%) |

## Aggregated Barriers Score

What is your likelihood of ..... (1 = least likely, 5 = most likely)

| Label                                                                       | Stats / Values                                                               | Freqs (% of Valid)                                                                         | Graph | Valid           |
|-----------------------------------------------------------------------------|------------------------------------------------------------------------------|--------------------------------------------------------------------------------------------|-------|-----------------|
| Have personal barriers that prevent you from reporting to work on-site?     | Mean (sd) : 1.8 (1.1)<br>min < med < max:<br>1 < 1 < 5<br>IQR (CV) : 1 (0.6) | 1 : 896 (56.9%)<br>2 : 364 (23.1%)<br>3 : 176 (11.2%)<br>4 : 76 ( 4.8%)<br>5 : 62 ( 3.9%)  |       | 1574<br>(99.8%) |
| Have professional barriers that prevent you from reporting to work on-site? | Mean (sd) : 1.5 (0.9)<br>min < med < max:<br>1 < 1 < 5<br>IQR (CV) : 1 (0.6) | 1 : 1107 (70.6%)<br>2 : 286 (18.2%)<br>3 : 102 ( 6.5%)<br>4 : 39 ( 2.5%)<br>5 : 34 ( 2.2%) |       | 1568<br>(99.4%) |

## Aggregated Response Outcome Score

Each question aggregated separately to create the three response outcomes (ready, willing, able)

Do you agree with the following statements .... (1 = strongly disagree, 5 = strongly agree)

| Label                                                                    | Stats / Values                                                               | Freqs (% of Valid)                                                                        | Graph | Valid           |
|--------------------------------------------------------------------------|------------------------------------------------------------------------------|-------------------------------------------------------------------------------------------|-------|-----------------|
| I am prepared and ready to respond to work during the COVID-19 pandemic. | Mean (sd) : 4.5 (0.8)<br>min < med < max:<br>1 < 5 < 5<br>IQR (CV) : 1 (0.2) | 1 : 20 ( 1.3%)<br>2 : 41 ( 2.6%)<br>3 : 117 ( 7.5%)<br>4 : 383 (24.6%)<br>5 : 996 (64.0%) |       | 1557<br>(98.7%) |
| I am willing to respond to work during the COVID-19 pandemic.            | Mean (sd) : 4.5 (0.8)<br>min < med < max:<br>1 < 5 < 5<br>IQR (CV) : 1 (0.2) | 1 : 15 ( 1.0%)<br>2 : 35 ( 2.2%)<br>3 : 114 ( 7.3%)<br>4 : 412 (26.3%)<br>5 : 992 (63.3%) |       | 1568<br>(99.4%) |
| I feel I am able to respond to work during the COVID-19 pandemic.        | Mean (sd) : 4.6 (0.7)<br>min < med < max:<br>1 < 5 < 5<br>IQR (CV) : 1 (0.2) | 1 : 11 ( 0.7%)<br>2 : 20 ( 1.3%)<br>3 : 74 ( 4.7%)<br>4 : 372 (23.7%)<br>5 : 1090 (69.6%) |       | 1567<br>(99.4%) |

## Distribution of Aggregated Outcome Scores

| Label | Stats / Values | Freqs (% of Valid) | Graph | Valid |
|-------|----------------|--------------------|-------|-------|
|-------|----------------|--------------------|-------|-------|

| Label                        | Stats / Values | Freqs (% of Valid) | Graph | Valid           |
|------------------------------|----------------|--------------------|-------|-----------------|
| Aggregated Knowledge Score   | 1. Low         | 737 ( 47.1%)       |       | 1565<br>(99.2%) |
|                              | 2. High        | 828 ( 52.9%)       |       |                 |
| Aggregated Confidence Score  | 1. Low         | 906 ( 57.6%)       |       | 1572<br>(99.7%) |
|                              | 2. High        | 666 ( 42.4%)       |       |                 |
| Aggregated Threat Score      | 1. Low         | 721 ( 46.5%)       |       | 1550<br>(98.3%) |
|                              | 2. High        | 829 ( 53.5%)       |       |                 |
| Aggregated Efficacy Score    | 1. Low         | 656 ( 42.0%)       |       | 1562<br>(99.0%) |
|                              | 2. High        | 906 ( 58.0%)       |       |                 |
| Aggregated Barriers Score    | 1. Low         | 842 ( 53.8%)       |       | 1566<br>(99.3%) |
|                              | 2. High        | 724 ( 46.2%)       |       |                 |
| Aggregated Readiness Score   | 1. Low         | 561 ( 36.0%)       |       | 1557<br>(98.7%) |
|                              | 2. High        | 996 ( 64.0%)       |       |                 |
| Aggregated Willingness Score | 1. Low         | 576 ( 36.7%)       |       | 1568<br>(99.4%) |
|                              | 2. High        | 992 ( 63.3%)       |       |                 |
| Aggregated Ability Score     | 1. Low         | 477 ( 30.4%)       |       | 1567<br>(99.4%) |
|                              | 2. High        | 1090 ( 69.6%)      |       |                 |
