# Supplementary material
Source: PubMed Central journal article supplement (PMC9081026)
Supplement: Supp_TableS3.pdf [file Supp_TableS3.pdf]

# Supplemental Table 3 - Correlation Matrixes to test for Collinearity

job.n = job role, job\_time\_binary.n = time in job, job\_region = location, job\_home = stay-at-home orders, dem\_age = age, dem\_gender = gender, dem\_race = race/ethnicity, dem\_marital = marital status, dem\_housenum = household number, dem\_dependnum = number of household dependents, dem\_essential = living with an essential worker, dem\_salary1 = annual salary

## Correlation Matrix

|                   | job.n  | job_time_binary.n | job_region | job_leader | job_home | dem_age | dem_gender | dem_race | dem_marital | dem_housenum | dem_dependnum | dem_essential | dem_salary1 |
|-------------------|--------|-------------------|------------|------------|----------|---------|------------|----------|-------------|--------------|---------------|---------------|-------------|
| job.n             | 1      | 0.042             | 0.072      | -0.021     | -0.051   | 0.037   | 0.023      | -0.048   | 0.025       | 0.060        | 0.100         | -0.031        |             |
| job_time_binary.n | 0.042  | 1                 | 0.003      | 0.282      | -0.012   | 0.424   | -0.131     | 0.031    | 0.139       | 0.014        | 0.093         | -0.043        |             |
| job_region        | 0.072  | 0.003             | 1          | 0.031      | 0.095    | 0.035   | -0.009     | -0.014   | 0.020       | 0.023        | 0.031         | -0.004        |             |
| job_leader        | -0.021 | 0.282             | 0.031      | 1          | -0.043   | 0.270   | -0.095     | 0.030    | 0.094       | 0.086        | 0.139         | 0.049         |             |
| job_home          | -0.051 | -0.012            | 0.095      | -0.043     | 1        | 0.003   | 0.078      | 0.034    | -0.010      | -0.059       | -0.091        | 0.001         |             |
| dem_age           | 0.037  | 0.424             | 0.035      | 0.270      | 0.003    | 1       | -0.228     | 0.037    | 0.287       | 0.005        | 0.096         | -0.112        |             |
| dem_gender        | 0.023  | -0.131            | -0.009     | -0.095     | 0.078    | -0.228  | 1          | 0.090    | -0.032      | 0.001        | -0.032        | 0.004         |             |
| dem_race          | -0.048 | 0.031             | -0.014     | 0.030      | 0.034    | 0.037   | 0.090      | 1        | 0.073       | -0.023       | -0.023        | -0.064        |             |
| dem_marital       | 0.025  | 0.139             | 0.020      | 0.094      | -0.010   | 0.287   | -0.032     | 0.073    | 1           | 0.239        | 0.252         | 0.104         |             |
| dem_housenum      | 0.060  | 0.014             | 0.023      | 0.086      | -0.059   | 0.005   | 0.001      | -0.023   | 0.239       | 1            | 0.781         | 0.289         |             |
| dem_dependnum     | 0.100  | 0.093             | 0.031      | 0.139      | -0.091   | 0.096   | -0.032     | -0.023   | 0.252       | 0.781        | 1             | 0.132         |             |
| dem_essential     | -0.031 | -0.043            | -0.004     | 0.049      | 0.001    | -0.112  | 0.004      | -0.064   | 0.104       | 0.289        | 0.132         | 1             |             |
| dem_salary1       | 0.197  | 0.140             | 0.043      | 0.165      | 0.015    | 0.315   | -0.126     | 0.016    | 0.174       | 0.241        | 0.188         | 0.100         |             |

No significance based on Spearman correlation statistic
