# Supplementary material
Source: PubMed Central journal article supplement (PMC9081026)
Supplement: Supp_TableS4.pdf [file Supp_TableS4.pdf]

# Supplemental Table 4 - Chi-Squared Comparison in Key Variables between Complete and Non-Complete Survey Respondents

Differences in job and demographic factors between respondents who completed all sections of the survey and those who did not

| Variable                        | Chi-Squared p-value |
|---------------------------------|---------------------|
| Job Role                        | 0.002               |
| Time in Job                     | 0.4298              |
| Leadership Role                 | 0.1589              |
| Age                             | 0.001               |
| Gender                          | 0.2004              |
| US Region                       | 0.5612              |
| Area in Stay-at-Home Order      | 0.2529              |
| Race                            | 0.9595              |
| Marital Status                  | 0.5752              |
| Dependent Number                | 0.2469              |
| Living with an Essential Worker | 0.933               |
| Annual Household Income         | 0.4593              |
